# Supplementary material for: Phase I study of bintrafusp alfa, a bifunctional fusion protein targeting TGF-β and PD-L1, in patients with pretreated biliary tract cancer
Source: PubMed Central journal article supplement — J Immunother Cancer. 2020 May 26;8(1):e000564. doi: 10.1136/jitc-2020-000564 (PMC7254161; doi:10.1136/jitc-2020-000564), 2020-05-26
Supplement: jitc-2020-000564supp002.pdf [file jitc-2020-000564supp002.pdf]

**Table S1: Immune-related adverse events in patients treated with bintrafusp alfa**

| <b>Preferred term</b>                   | <b>N=30</b>     |
|-----------------------------------------|-----------------|
| <b>Any immune-related adverse event</b> | <b>11 (37%)</b> |
| Immune-related rash                     | 6 (20)          |
| Rash maculo-papular                     | 4 (13)          |
| Rash                                    | 2 (7)           |
| Dermatitis acneiform                    | 1 (3)           |
| Immune-related adrenal insufficiency    | 2 (7)           |
| Immune-related hepatitis                | 2 (7)           |
| Alanine aminotransferase increased      | 2 (7)           |
| Aspartate aminotransferase increased    | 2 (7)           |
| Immune-related pneumonitis              | 2 (7)           |
| Interstitial lung disease               | 2 (7)           |
| Immune-related thyroid disorders        | 2 (7)           |
| Hypothyroidism                          | 1 (3)           |
| Thyroiditis                             | 1 (3)           |
| Other immune-related adverse events     | 1 (3)           |
| Psoriasis                               | 1 (3)           |

Data are n (%).
