# Supplementary material for: Phase I study of bintrafusp alfa, a bifunctional fusion protein targeting TGF-β and PD-L1, in patients with pretreated biliary tract cancer
Source: PubMed Central journal article supplement — J Immunother Cancer. 2020 May 26;8(1):e000564. doi: 10.1136/jitc-2020-000564 (PMC7254161; doi:10.1136/jitc-2020-000564), 2020-05-26
Supplement: jitc-2020-000564supp004.pdf [file jitc-2020-000564supp004.pdf]

**Fig S2: Change in target lesions from baseline according to PD-L1 status adjudicated by the independent review committee**

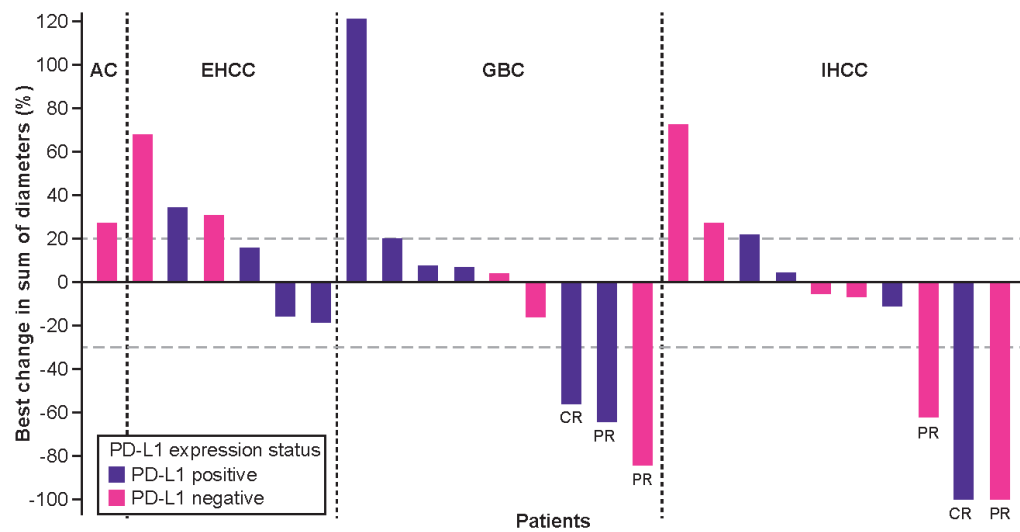

Responses were assessed in accordance with Response Evaluation Criteria in Solid Tumors (RECIST) version 1.1. The upper dashed horizontal line represents progression at 20% increase in size of target lesions, and the lower dashed horizontal line represents the RECIST 1.1 boundary for complete response or partial response at 30% decrease in size of target lesions. Patients with no postbaseline assessment ( $n=2$ ) or no target lesions identified by the independent review committee before first dose ( $n=2$ ) are not displayed. AC, ampullary cancer; CR, complete response; EHCC, extrahepatic cholangiocarcinoma; GBC, gallbladder carcinoma; IHCC, intrahepatic cholangiocarcinoma; PR, partial response.
